# Polymorphism-aware models in RevBayes: Species trees, disentangling Balancing Selection and GC-biased gene conversion

Authors: Svitlana Braichenko<sup>1</sup>, Rui Borges<sup>2</sup> and Carolin Kosiol<sup>1</sup>

<sup>1</sup> Centre for Biological Diversity, School of Biology, University of St Andrews, Fife KY16 9TH, UK

<sup>2</sup> Institut für Populationsgenetik, Vetmeduni Vienna, 1210 Wien, Austria

Corresponding author: Carolin Kosiol, +44 (0)1334 463598, [ck202@st-andrews.ac.uk](mailto:ck202@st-andrews.ac.uk)

ORCID IDs: 0000-0003-3330-6631 (S.B.); 0000-0002-5905-3778 (R.B.); 0000-0002-3219-6648 (C.K.)

## Abstract

The role of balancing selection is a long-standing evolutionary puzzle. Balancing selection is a crucial evolutionary process that maintains genetic variation (polymorphism) over extended periods, however, detecting it poses a significant challenge. Building upon the polymorphism-aware phylogenetic models (PoMos) framework, we introduce PoMoBalance designed to disentangle the interplay of mutation, genetic drift, directional and balancing selection pressures influencing population diversity. Rooted in the Moran model, PoMos have demonstrated efficiency in species tree inference, capturing mutational effects, fixation biases, and GC-bias rates. Implemented in the open-source RevBayes Bayesian framework, PoMoBalance offers a versatile tool for multi-individual data analysis. This study extends PoMos' capabilities to explore balancing selection and disentangle it from GC-biased gene conversion. The novel aspect of our approach in studying balancing selection lies in PoMos' ability to account for ancestral polymorphisms and incorporate parameters that measure frequency-dependent selection. We implemented validation tests and assessed the model on the data simulated with SLiM and a custom Moran model simulator. Real sequence analysis of *Drosophila* populations reveals insights into the evolutionary dynamics of regions subject to frequency-dependent balancing selection, particularly in the context of sex-limited colour dimorphism.

**Keywords:** polymorphism-aware phylogenetic models, balancing selection, GC-biased gene conversion, Bayesian inference with MCMC, site frequency spectrum, species trees.

# 1 Introduction

Balancing selection (BS) represents a form of natural selection that maintains beneficial genetic diversity within populations (Bitarello *et al.*, 2023). Multiple mechanisms contribute to maintaining variation, such as the heterozygote advantage or overdominance (heterozygous individuals having higher fitness), frequency-dependent selection (an individual's fitness depends on the frequencies of other phenotypes or genotypes), antagonistic selection (in contexts like sexual conflicts or tissue-specific antagonism) and selection that changes through time or space in population. The evidence for BS is extensive, including examples from immune response such as the major histocompatibility complex (MHC) (Andrés *et al.*, 2009; Spurgin and Richardson, 2010; Bitarello *et al.*, 2018), pathogen resistance (Bakker *et al.*, 2006), plant and fungi self-incompatibility (Lawrence, 2000; Castric and Vekemans, 2004), and sex-related genes (Charlesworth, 2004; Connallon and Clark, 2014; Mank, 2017; Kim *et al.*, 2019).

BS finds its roots in the "balance hypothesis", according to which populations exhibited high levels of diversity, with natural selection maintaining a balance among different alleles (Dobzhansky, 1955). Although the classical theory, describing population evolution through the interplay of mutations and selections with varying strengths and effects whether positive or purifying, has diminished the ubiquity of the balancing hypothesis, it remains a valuable concept for explaining the persistence of polymorphisms over extended periods. Based on their temporal span, three types of balancing selection exist according to Bitarello *et al.* (2023): ultra long-term ( $> 7 \times 10^6$  years, e.g., MHC locus (Kelley *et al.*, 2005)), long-term ( $10^6$  years, e.g., ERAP2 (Andrés *et al.*, 2010)) and recent ( $< 10^6$  years, e.g., sickle-cell disease (Laval *et al.*, 2019)).

The heterozygote advantage stands out as one of the initially proposed mechanisms for balancing selection, with the textbook example of African populations: homozygous individuals are susceptible to sickle-cell disease, while heterozygous individuals exhibit resistance to malaria (Laval *et al.*, 2019). Another well-known mechanism is frequency-dependent balancing selection, observed when the fitness of one individual depends on the frequencies of other phenotypes or genotypes in the population. Very often, frequency-dependent selection manifests in the maintenance of several advantageous phenotypes in a population. In the context of this study, we focus on long-term balancing selection ( $\sim 5$  million years), leading to dimorphism in female *Drosophila erecta*. This dimorphism may serve to help females avoid the costs associated with

repeated matings (Yassin *et al.*, 2016).

BS poses a significant challenge to detection methods due to its subtle nature, often entangled with structural variants and linkage disequilibrium (Charlesworth, 2006; Fijarczyk and Babik, 2015). Recent efforts have been made to propose universal and robust frameworks for BS detection. These include approaches based on genome scans with multiple summary statistics and likelihood-ratio tests (Andrés *et al.*, 2009; Siewert and Voight, 2017; Cheng and DeGiorgio, 2019, 2020, 2022), as well as deep-learning models (Sheehan and Song, 2016; Isildak *et al.*, 2021; Korfmann *et al.*, 2023). Cheng and DeGiorgio (2022) strive to disentangle directional selection (DS) from balancing selection, yet their approach requires intricate information about populations such as recombination maps. Furthermore, current methods often exhibit low power and are susceptible to false positives.

Evaluating the effect of BS remains challenging, requiring more model-based approaches (Fijarczyk and Babik, 2015; Bitarello *et al.*, 2023). Specifically, we need models that go beyond the heterozygote advantage, encompassing frequency-dependent selection, and incorporating both balancing and directional selection. Moreover, these models should enable genome-wide inferences and accommodate analyses across numerous individuals and populations. In this context, we introduce a novel BS model that addresses these multifaceted aspects.

## 2 Materials and Methods

### 2.1 Modelling the Balancing Selection with PoMoBalance

The role of BS has been a topic of considerable debate over the last century Bitarello *et al.* (2023). With the advent of new sequencing technologies, there has been a renewed interest in this phenomenon. Some models, such as those based on heterozygote advantage and sexual antagonism, have been proposed by Connallon and Clark (2014); Zeng *et al.* (2021). While these models are valuable for describing allele frequency dynamics in populations, they become impractical for inference due to their lack of generality and expanding parameter space.

Thus, a flexible enough to capture the intricate effects of BS yet simple model is required for inferring frequency-dependent selection. PoMos prove to be valuable for this purpose, as they are rooted in polymorphisms characterized by the prolonged existence of multiple genetic

variations — markers of BS (Bitarello *et al.*, 2023). This phenomenon manifests in a shift in the site frequency spectrum (SFS) towards an excess of intermediate frequency variants. These are sometimes identifiable by a peak in the intermediate frequencies of the SFS that cannot be explained by the interplay between mutation, genetic drift, and directional selection, as mentioned in Andrés *et al.* (2010), thus, it is associated with BS.

The PoMoBalance model (depicted in Figure 1 (A)) can be regarded as an extension of the PoMos with allelic selection introduced by Borges *et al.* (2019); Borges and Kosiol (2020); Borges *et al.* (2022a,b). We will refer to the latter as PoMoSelect henceforth for brevity. It is part of a family of models known as PoMos, as defined by De Maio *et al.* (2013, 2015) and then followed by Schrempf *et al.* (2016, 2019). PoMos are continuous-time Markov chain models based on the Moran model (Moran, 1958). The Moran model is a stochastic process that simulates a virtual population of  $N$  haploid individuals, with the power to incorporate boundary mutations and directional selection. It bears similarities to the Wright-Fisher model, which counts time in the number of generations. In contrast, the Moran model is continuous-time, measuring time in the number of births (Lanchier, 2017). This characteristic makes the Moran model advantageous for phylogeny and experimental evolution approaches that rely on a continuous-time paradigm.

In this paper, we extend the Moran model to include balancing selection. The model encompasses  $4 + 6(N - 1)$  distinct states, with 4 monomorphic boundary states, denoting scenarios in which all individuals share the same allele. In contrast, the intermediate  $6(N - 1)$  states represent polymorphisms, where some individuals possess different alleles. In this model, we consider biallelic polymorphisms only. The alleles are denoted as  $a_i$  (depicted as blue circles) and  $a_j$  (depicted as orange circles), signifying the four nucleotides  $i, j = \{A, C, G, T\}$ . The combinations of alleles, indicated as  $a_i a_j$ , represent the possible pairs without repetition, namely  $AC$ ,  $AG$ ,  $AT$ ,  $CG$ ,  $CT$ , or  $GT$ .

The model incorporates mutation rates,  $\mu_{a_i a_j}$  and  $\mu_{a_j a_i}$  (as illustrated in Figure 1 (A)), which govern transitions from the monomorphic states, representing boundary mutations. Very often the reversibility of the model is defined from certain symmetries. In PoMoSelect the mutation rates are presented as  $\mu_{a_i a_j} = \rho_{a_i a_j} \pi_{a_j}$  and  $\mu_{a_j a_i} = \rho_{a_j a_i} \pi_{a_i}$  similar to Tavaré (1986), where  $\rho_{a_j a_i}$  are exchangeabilities and  $\pi_{a_j}$  are nucleotide base frequencies. If  $\rho_{a_i a_j} = \rho_{a_j a_i}$  the model is reversible, and it is non-reversible otherwise.

In the previous PoMos, frequency shifts between polymorphic states are governed by genetic drift and directional selection favouring or disfavouring the reproduction of the  $a_i$  allele. The fitness values are represented by  $\phi_{a_i} = 1 + \sigma_{a_i}$ , where  $\sigma_{a_i}$  is a selection coefficient. In PoMoBalance, these frequency shifts additionally include balancing selection transition rates are regulated by the concept of multiplicative fitness, expressed by the following equation

$$\Phi_n^{a_i^\mp} = \underbrace{\frac{n(N-n)}{N}}_{\text{drift}} \underbrace{(1 + \sigma_{a_i,j})}_{\text{DS}} \underbrace{\beta_{a_i a_j}^{\frac{1}{2} [|n - B_{a_i a_j}| - |n \mp 1 - B_{a_i a_j}| + 1]}}_{\text{BS}} \quad (1)$$

where there are three components: the first fraction corresponds to genetic drift or neutral mutations and the second multiplier represents directional selection, modelled similarly to previous PoMos. The final term in the form of a power-law function characterizes BS. It is governed by two key factors: the strength of BS, denoted as  $\beta_{a_i a_i}$  (with  $\beta_{a_i a_i} > 0$ ), and a preferred frequency denoted as  $B_{a_i a_j}$ . The preferred frequency, a natural number within the range  $0 < B_{a_i a_j} < N$ , designates the position of the polymorphic peak associated with BS in the SFS. Note that if  $\beta_{a_i a_i} = 1$  the resulting model aligns with the PoMoSelect model. We modelled BS in a frequency-dependent manner, in which the strength of balancing selection governing the frequency shifts towards a favoured frequency.

Reversibility criteria for PoMoBalance are different from those for the PoMoSelect model due to the higher complexity of the transition rates from the polymorphic states brought by balancing terms. PoMoBalance is reversible only if exchangeabilities are symmetric and the preferred frequency is in the middle of the chain  $B_{a_i a_j} = N/2$ , where  $N$  is even, for more details see Section Supplementary Material 1.

Furthermore, we always assume that both  $B_{a_i a_j}$  and  $\beta_{a_i a_i}$  are symmetric. The strength of BS operates similarly to directional selection, but rather than favouring the fixation of alleles, it promotes the persistence of polymorphisms. In Figure 1 (A), we visualize this additional attraction towards the preferred polymorphic state with dark red arrows when  $\beta_{a_i a_i} > 1$ . After replacing variables and simplifying the expressions with power terms, the transition rates become  $\Phi_n^{a_i^\mp} = \frac{n(N-n)}{N} \phi_{a_i,j} \beta_{a_i a_j}$ , if  $n < B_{a_i a_j}$ , and the absence of the BS attractor is indicated with light red crossed arrows in the figure when  $\Phi_n^{a_i^\mp} = \frac{n(N-n)}{N} \phi_{a_i,j}$ , if  $n \geq B_{a_i a_j}$ . To provide a more concrete example, we represent the transition rates of a population with  $N = 4$  individuals in Figure 1 (B), where the preferred state is  $B = 2$ . It is important to note that in cases where

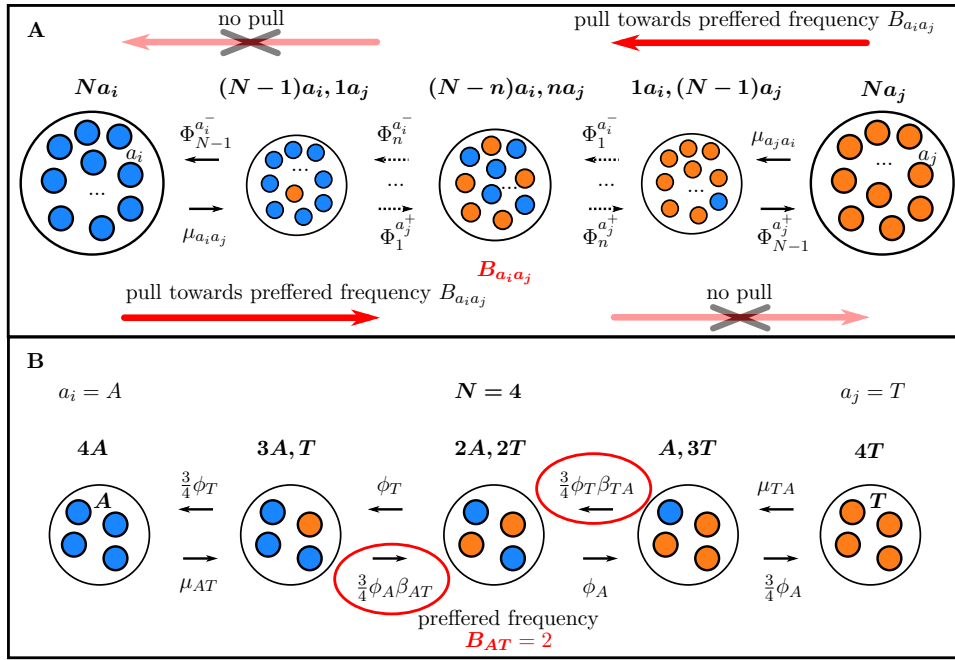

Figure 1: (A) PoMoBalance model, presented as a Markov chain Moran-based model. The boundary states (monomorphic) are denoted by larger circles. These states encompass  $N$  individuals, with the left side showcasing individuals carrying the  $a_i$  allele (depicted as blue circles), and the right side representing individuals with the  $a_j$  allele (represented by orange circles). In contrast, all the intermediate states, reflecting polymorphic conditions, are displayed using smaller circles. The transition rates from the monomorphic states are determined by mutation rates, whereas the transition rates from the polymorphic states are governed by the multiplicative fitness as indicated in Equation (1). Additionally, the multiplicative fitness encapsulates not only the DS effect but also the influence of BS, which exerts a force towards the state with the preferred allele frequency,  $B_{a_i a_j}$ , represented by dark red arrows. If the transition occurs against this preferred state, there is no such attracting force, signified by the light red crossed arrows. (B) A specific instance of the PoMoBalance model, featuring a population size of  $N = 4$ .

$\beta_{a_i a_i} < 1$ , we do not model balancing selection, but instead a form of purging selection occurs that leads to the removal of polymorphisms more than expected by drift (see Section Supplementary Material 1).

In the broader context, the PoMoBalance model can be characterised through the instantaneous rate matrix denoted as  $Q$ , where each specific transition rate within the model corresponds to an element of this matrix

$$q^{\{na_i, (N-n)a_j\} \rightarrow \{ma_i, (N-m)a_j\}} = \begin{cases} \mu_{a_i a_j} & \text{if } n = N, m = N - 1 \\ \mu_{a_j a_i} & \text{if } n = 0, m = 1 \\ \frac{n(N-n)}{N} (1 + \sigma_{a_i}) \beta_{a_i a_j}^{\frac{1}{2}} [ |n - B_{a_i a_j}| - |n + 1 - B_{a_i a_j}| + 1 ] & \text{if } m = n + 1 \\ \frac{n(N-n)}{N} (1 + \sigma_{a_j}) \beta_{a_i a_j}^{\frac{1}{2}} [ |n - B_{a_i a_j}| - |n - 1 - B_{a_i a_j}| + 1 ] & \text{if } m = n - 1 \\ 0 & \text{if } |m - n| > 1 \end{cases}, \quad (2)$$

where the variables  $n$  and  $m$  represent absolute frequencies of alleles. Since PoMoBalance is Moran-based model, the allele frequency shifts exceeding one are prohibited, as specified in the final condition outlined in Equation (2). The diagonal elements of this matrix are determined such that the sum of each respective row is equal to zero.

Both the PoMoSelect and PoMoBalance models have been incorporated into a Bayesian phylogenetic inference framework RevBayes (Höhna *et al.*, 2016; Hohna *et al.*, 2017; Höhna *et al.*, 2018; Borges *et al.*, 2022b), available at <https://revbayes.github.io/>, employing a probabilistic graphical model representation.

## 2.2 Bayesian Inference using PoMoBalance with RevBayes

For over a decade, PoMos have been integrated and adopted within the fields of phylogenetic inference. Initially, employing Maximum Likelihood approaches for neutral models in software like HyPhy (De Maio *et al.*, 2013) and IQ-Tree (Schrempf *et al.*, 2019). Subsequently, these models progressed to include allelic selection within Bayesian frameworks, facilitated by R-packages (Borges *et al.*, 2019) and RevBayes (Borges *et al.*, 2022a,b).

The advantage of using RevBayes for implementing PoMos is the flexibility of the use of probabilistic graphical models allowing us to combine complex models while taking advantage of communicating them with users through extensive tutorials and discussion forums. RevBayes employs a Bayesian inference based on the Markov chain Monte Carlo (MCMC) sampler and it is an open-source framework for phylogenetic inference, molecular dating, discrete morphology and ancestral state reconstruction. Our implementation of PoMoBalance within RevBayes allows users to infer phylogenetic trees, allelic selection and now to identify balancing selection. In contrast to the previous approaches for detecting BS (Hudson *et al.*, 1987; Tajima, 1989; Siewert and Voight, 2017; Cheng and DeGiorgio, 2020; Isildak *et al.*, 2021), our software allows not only identifying balancing selection but also quantifying its strength and pinpointing the alleles and their frequencies under selection at phylogenetic scales. For a detailed guide on implementing RevBayes scripts with PoMoBalance, please refer to the PoMoBalance tutorial (<https://revbayes.github.io/tutorials/pomobalance/>).

In PoMos' data input, count files are employed, which can be generated from FASTA sequences of multiple individuals and species or VCF files with the corresponding reference using the

`cflib` package available on GitHub at <https://github.com/pomo-dev/cflib> (Schrempf *et al.*, 2016). Additionally, RevBayes includes a built-in tool to correct for sampling biases, which can be helpful when the number of individuals sampled from populations varies and when it differs from the PoMo population size. These biases may emerge from undersampling genetic diversity, where polymorphic sites sampled from larger populations may erroneously appear monomorphic. To address this, the binomial sampling method, as initially proposed by Schrempf *et al.* (2016), assists in smoothing out sampling biases at the tips of a phylogenetic tree.

Additionally, PoMoSelect includes a rescaling tool for adjusting inferred parameters across different population sizes. Parameters calculated in the PoMos, originally in terms of virtual population sizes, can be rescaled to represent the actual population sizes. This rescaling is achieved using the mapping method introduced by Borges *et al.* (2019).

RevBayes offers several PoMo functions tailored to different inference scenarios, including `fnPomoKN`, `fnReversiblePomoKN`, `fnPomoBalanceKN` and `fnReversiblePomoBalanceKN`. The first two functions are discussed in detail by Borges *et al.* (2022b). The roles and input parameters for each function are summarised in Table 1. They are designed to infer data from  $K$  alleles, with the

| Function                               | Description                                                                                                                                   | Parameters                     |
|----------------------------------------|-----------------------------------------------------------------------------------------------------------------------------------------------|--------------------------------|
| <code>fnPomoKN</code>                  | Describes the evolution of a population with $K$ alleles and $N$ individuals subjected to mutational bias and selection.                      | $K, N, \mu, \phi$              |
| <code>fnReversiblePomoKN</code>        | Particular case of PoMoKN when mutations are considered reversible.                                                                           | $K, N, \pi, \rho, \phi$        |
| <code>fnPomoBalanceKN</code>           | Describes the evolution of a population with $K$ alleles and $N$ individuals subjected to mutational bias, selection and balancing selection. | $K, N, \mu, \phi, \beta, B$    |
| <code>fnReversiblePomoBalanceKN</code> | Particular case of PoMoBalanceKN when mutations are considered reversible and the preferred frequency is in the middle $B = \frac{N}{2}$ .    | $K, N, \pi, \rho, \phi, \beta$ |

Table 1: PoMo functions and parameters in RevBayes.

most common scenario involving  $K = 4$ , although other options (e.g.,  $K = 2$ ) are also available. Additionally, RevBayes accommodates the parameters of the Moran model outlined in Subsection 2.1, including

1. The virtual population size  $N$ .



2. Two vectors defining the mutation rates through nucleotide base frequencies  $\pi = (\pi_A, \pi_C, \pi_G, \pi_T)$  and exchangeabilities  $\rho = (\rho_{AC}, \rho_{AG}, \rho_{AT}, \rho_{CG}, \rho_{CT}, \rho_{GT})$ , where  $\mu_{AC} = \rho_{AC}\pi_C$  and similar mutations follow accordingly.
3. A vector encompassing allele fitnesses, which, in our case, reflects GC-biased gene conversion (gBGC) as previously inferred by [Borges \*et al.\* \(2019\)](#). This phenomenon is modelled akin to DS, with relative fitnesses for *C* and *G* alleles higher than those for *A* and *T* alleles. It is represented via the vector  $\phi = 1 + \sigma = (1, 1 + \sigma, 1 + \sigma, 1)$ , where  $\sigma$  represents a GC-bias rate.
4. Two vectors specifying the strength and location of the balancing selection peak at each edge:  $\beta = (\beta_{AC}, \beta_{AG}, \beta_{AT}, \beta_{CG}, \beta_{CT}, \beta_{GT})$  and  $B = (B_{AC}, B_{AG}, B_{AT}, B_{CG}, B_{CT}, B_{GT})$ .

For the Bayesian inferences conducted here, we employ `dnDirichlet` priors on base frequencies  $\pi$  and `mvBetaSimplex` moves due to their sum-to-unity nature. For  $\rho$ ,  $\sigma$  and  $\beta$  `dnExponential` priors are chosen as appropriate priors for positive real parameters. We use standard `mvScale` moves for these variables, but if they exhibit correlation, we may introduce additional moves like `mvUpDownScale`, `mvAVMVN`, `mvSlice` or `mvEllipticalSliceSamplingSimple` to mitigate the correlation. In some cases, we observed a correlation between  $\sigma$  and  $\beta$ , and incorporating the `mvAVMVN` move helped to resolve it for some chains. The preferred frequency  $B$  is a positive natural number within the range  $0 < B < N$ , and `Uniform` priors in this range are set. The variable is rounded on each MCMC step to obtain discrete results. We introduce two moves, `mvSlide` and `mvScale`, to enhance parameter space exploration. Such a technique leads to faster convergence compared to `UniformNatural` prior and discrete variable moves. We assign different weights to each move; however, the specific values are less critical since autotuning of weights occurs during the MCMC burn-in period. Our analysis involves running both the Metropolis-Hastings MCMC sampler (`mcmc`), and where relevant, the Metropolis-coupled MCMC sampler (`mcmc`), which includes high-temperature and cold chains to overcome local minima. Both versions normally run 4 parallel chains to ensure convergence.

### 2.3 Data Simulation and Analysis

Extensive testing of PoMoBalance has been conducted across multiple scenarios, employing data simulated through different techniques. Firstly, we conducted a built-in validation analysis

within RevBayes. Subsequently, a custom five-species tree (refer to Figure 3 (A)) was simulated using a Moran simulator in RevBayes. This was done to ensure the precise recovery of parameters from data simulated under the same model but in diverse evolutionary settings, including drift, CG-biased gene conversion, balancing selection, and a combination of balancing selection and gBGC. For drift and gBGC, we simulated  $10^5$  genomics sites, while for BS and the intertwined scenario of BS and gBGC, we required  $8 \times 10^5$  to achieve satisfactory convergence.

Furthermore, we assessed the performance of our package using data simulated within the evolutionary framework SLiM (Haller and Messer, 2019). In this test, we used a tree including four great ape species: orangutans from Borneo and Sumatra islands, chimpanzees, and humans (refer to Figure S2). This tree had been previously estimated without balancing selection using PoMos by Schrempf *et al.* (2016). The great ape species are of particular interest in the context of our paper as they exhibit several well-documented instances of balancing selection, such as those observed in the MHC locus (Cagan *et al.*, 2016). Another classical example of heterozygote advantage is sickle-cell disease, extensively studied in humans, however, its role in other great ape species remains a subject of debate (Laval *et al.*, 2019). In SLiM simulations, we implemented heterozygote advantage within the great apes tree to simulate balancing selection. Unlike the Moran simulator, SLiM simulations incorporated three regimes: drift, gBGC, and BS, as opposed to four. This adjustment was necessary due to the heterozygote advantage overpowering gBGC in SLiM. Other features not explicitly considered by the Moran model but simulated in SLiM are genetic recombination and demography. Refer to Section Supplementary Material 2 for more details on SLiM simulations.

Following this, we applied PoMoBalance to real datasets exhibiting balancing selection associated with sexual dimorphism in *Drosophila erecta* females (Yassin *et al.*, 2016). This case was chosen to exemplify frequency-dependent balancing selection in sexual selection, a topic of increasing interest (Croze *et al.*, 2017). Please refer to Section 7 for data availability details. Sequences were obtained for the *tan* gene in the  $t_{MSE}$  region. In addition to *Drosophila erecta* dark (7 individuals) and light (9 individuals), we extract data of multiple individuals from four closely related subspecies: *D. santomea* (10 individuals), *yakuba* (15 individuals), *melanogaster* (22 individuals) and *simulans* (18 individuals). We performed the sequence alignment using MAFFT software (Rozewicki *et al.*, 2019), filtered out sites containing more than 50% missing data and converted them into count files using the *cflib* package (Schrempf *et al.*, 2016). The final

sequences contained  $\sim 400$  sites. The data analysis pipeline is available in the supplementary repository (<https://github.com/sb2g14/PoMoBalance>).

## 3 Results

### 3.1 Validation Analysis for PoMoSelect and PoMoBalance

To validate the implementations of PoMoSelect and PoMoBalance, as depicted in Figure 2, we employ the Simulation-Based Calibration (SBC) procedure implemented in RevBayes (Talts *et al.*, 2020). This approach is commonly used to assess the accuracy of model implementations. In our study, we evaluate both the allelic selection model proposed previously by Borges *et al.* (2022b) and the model that incorporates allelic selection and balancing selection, as outlined in Equation (2).

The primary objective of SBC is to test the accuracy of parameter inference through the following steps:

1. Drawing multiple parameter values (1000 in our study) from the priors.
2. Simulating data samples (1000 sites) with these parameter values.
3. Performing MCMC inference for each sample.
4. Calculating coverage probabilities.

Coverage probabilities (Talts *et al.*, 2020) are estimated based on the observation that 90% (or any arbitrary percentage) of credible intervals obtained with MCMC should contain the simulated parameter value in 90% of the samples. SBC leverages the frequentist properties of Bayesian inference.

In Figure 2, we conduct SBC for four PoMo functions in both reversible and non-reversible implementations, simulating the trees with five taxa and a uniform topology. The markers in the figure represent coverage probabilities for various parameters, including tree branch lengths (red), fitnesses ( $\phi$ , yellow), nucleotide base frequencies ( $\pi$ , green), exchangeabilities ( $\rho$ , purple), mutation rates ( $\mu$ , magenta) BS strengths ( $\beta$ , teal) and preferred frequencies ( $B$ , cyan). Different marker types distinguish values corresponding to different alleles or their combinations as per

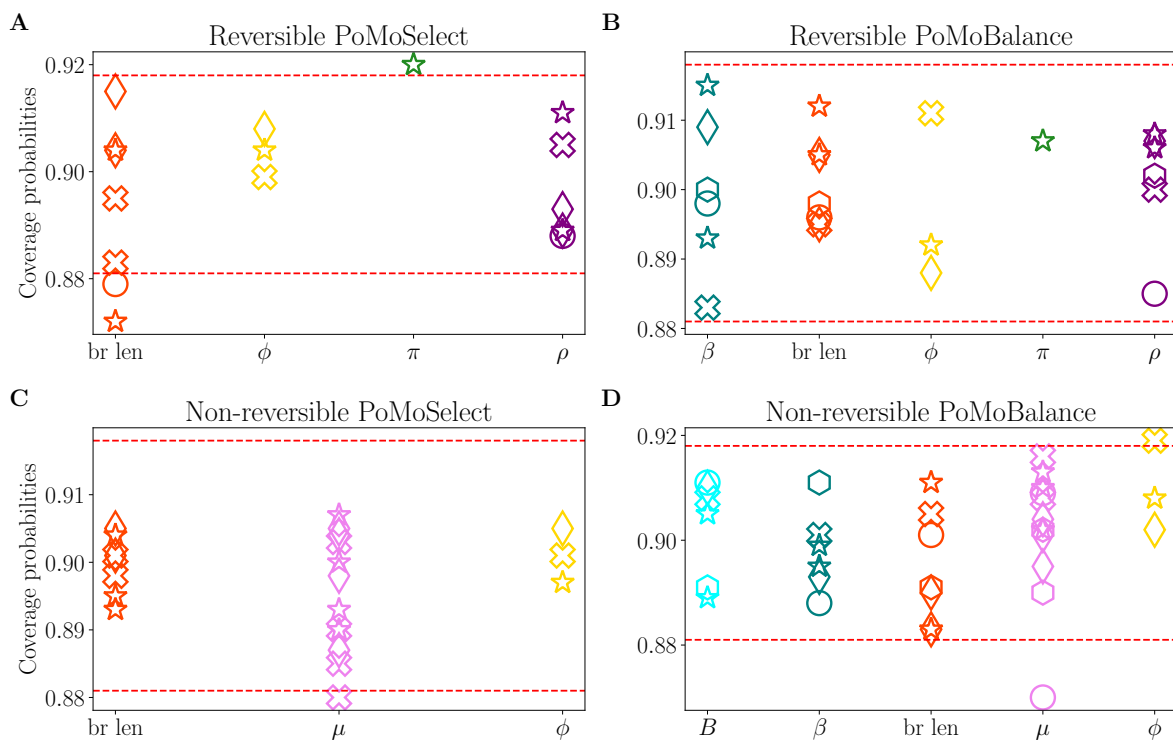

Figure 2: Coverage probabilities determined through validation analysis within RevBayes, employing distinct computational routines for reversible scenarios: (A) PoMoSelect and (B) PoMoBalance, as well as for non-reversible scenarios: (C) PoMoSelect and (D) PoMoBalance. The red dashed lines indicate 90% confidence intervals and fixed virtual population size for all cases was  $N = 4$ .

Subsection 2.2. Notably, nucleotide base frequencies exhibit a single coverage probability due to their origin from `dnDirichlet`. For fitnesses, three coverage probabilities are observed instead of four. This adjustment is made by fixing one of them to mitigate correlations between specific allelic fitnesses. The 90 % confidence bounds for MCMC are shown by red dashed lines.

Despite using a small virtual population size ( $N = 4$ ) for computational efficiency, the majority of coverage probabilities lie within or very close to the confidence bounds, ensuring the validity of the implementations. It is expected that the robustness of the results would improve with larger populations.

### 3.2 Testing PoMoBalance on the data generated with Moran and SLiM simulators

In this subsection, we assess the performance of the PoMoBalance model using data simulated under various evolutionary scenarios with two different simulators. The details for the data generated with the first simulator, referred to as the Moran simulator, are depicted in Figures 3 (A),

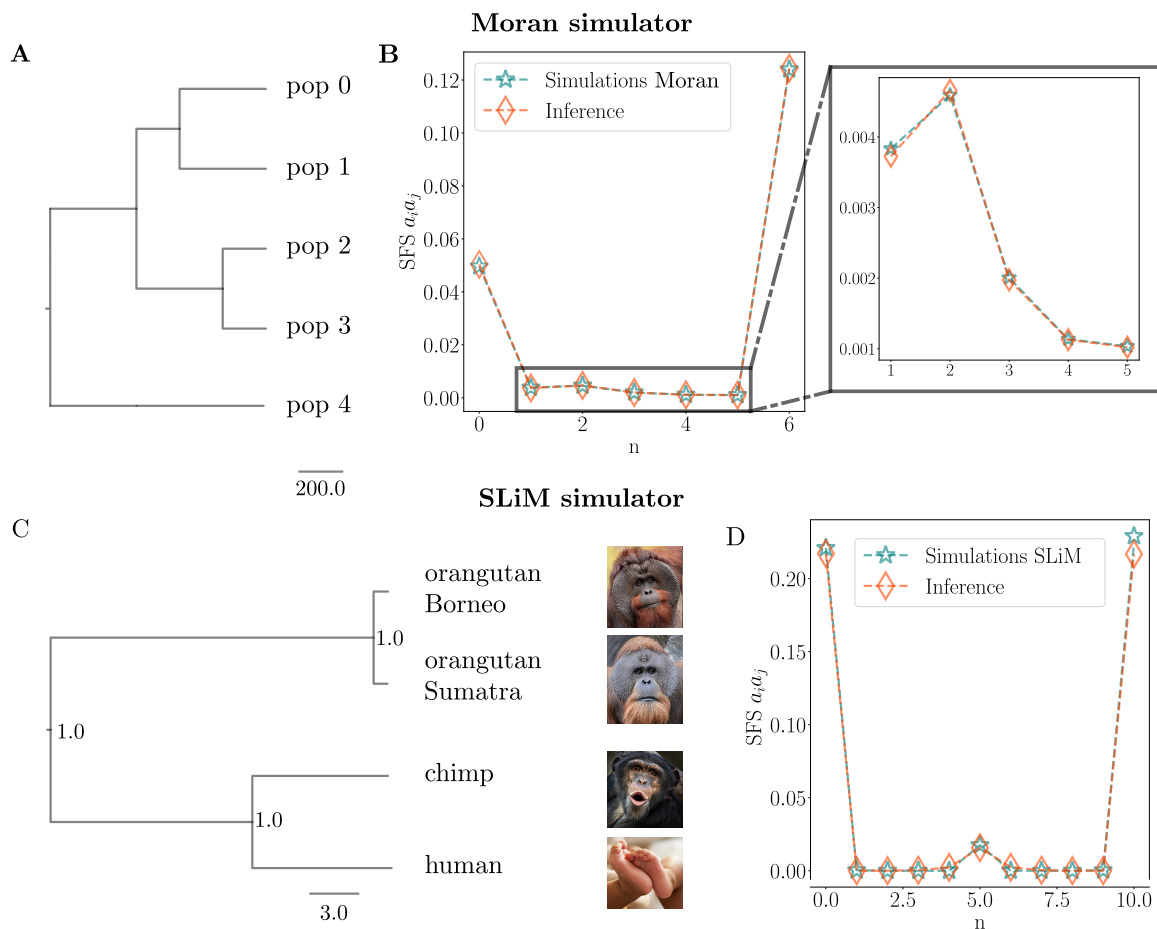

Figure 3: (A) Phylogenetic tree simulated using the Moran simulator within RevBayes, the branch lengths are expressed in numbers of generations; the tree remains fixed for these analyses (B) Site-frequency spectrum (SFS) of the data with balancing selection (BS) simulated using the Moran model with  $N = 6$  (blue stars), with the tree from (A) exhibiting good agreement with the SFS obtained from the inference using PoMoBalance (orange diamonds); the inset magnifies the BS peak. (C) Phylogenetic tree of great apes simulated with SLiM and subsequently inferred with RevBayes, the branch lengths are expressed in the number of substitutions per site. Posterior probabilities are indicated at the nodes. Images are distributed under a Creative Commons license from Wikimedia and Microsoft. (D) Comparison of the SFS with  $N = 10$ , akin to (B), obtained from the simulated data with SLiM and the tree from (C). The SFS representation ( $a_i a_j$ ) includes  $AC$ ,  $AG$ ,  $AT$ ,  $CG$ ,  $CT$  and  $GT$ , demonstrating similarity in all cases.

(B) and 4 (A), (B), (C). In this analysis, we utilise RevBayes and our PoMoBalance implementation to simulate PoMo states from the non-reversible Moran model for generality, employing pre-selected parameter values akin to the scenario described in the previous subsection. However, in this case, we employ a custom phylogenetic tree depicted in Figure 3 (A), use only a few parameter sets (shown in Supplementary Table S1) and omit the calculation of coverage probabilities. Instead, we evaluate how far the inferred values deviate from the true values, as illustrated in Figure 4 (A), (B) and (C).

Additionally, we compare the SFS in Figure 3 (B), calculated from the simulated data depicted by blue stars, with theoretical predictions derived using parameters inferred with PoMoBalance

illustrated with red diamonds. These theoretical predictions are estimated numerically from the PoMo matrix in Equation (2), using the Markovian property  $dP(t)/dt = P(t)Q$ , where  $P(t) = \exp(tQ)$ . By matrix exponentiation at very long times ( $t = 10^6$ ), we obtain the stationary distribution for the PoMo states, which coincides with the SFS. Further details about stationary frequencies in the PoMoBalance model can be found in Supplementary Figure S1.

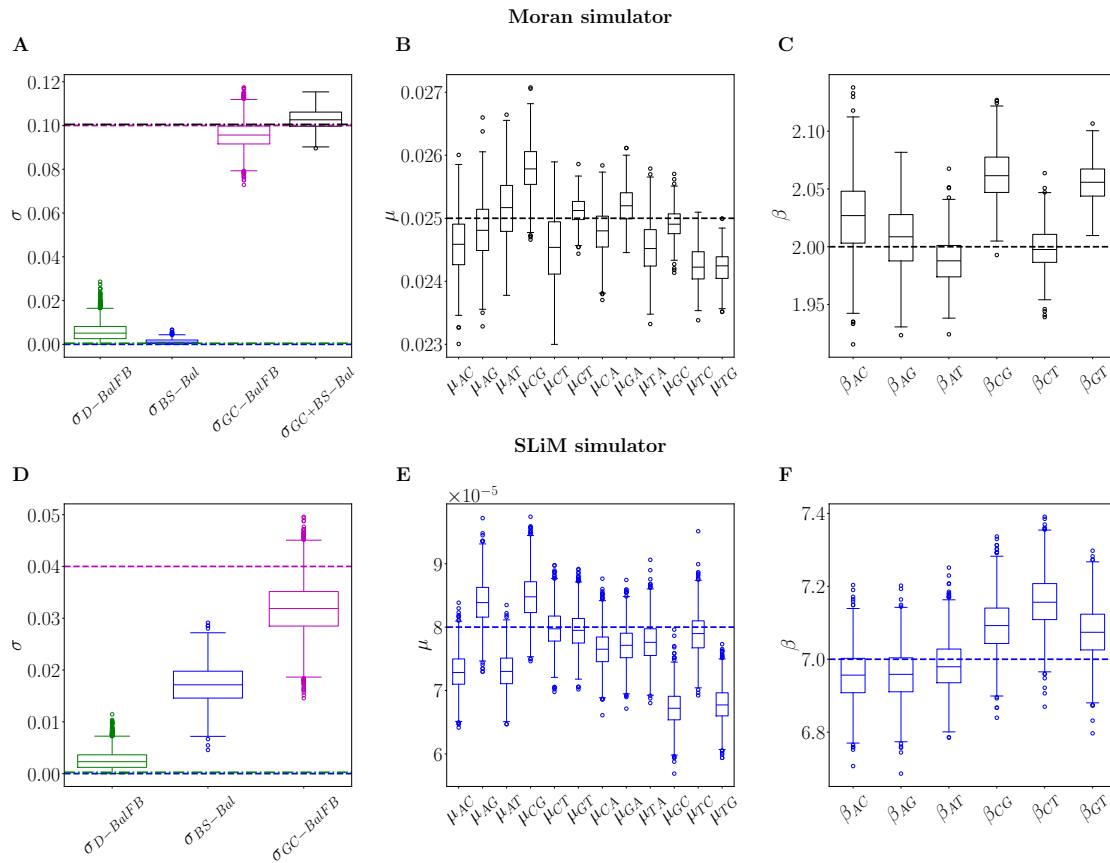

Figure 4: Posterior distributions of inferred parameters compared to their expected values. Subplots (A), (B), and (C) employ the Moran model simulator, in Figure 3 (A) and (B). Conversely, subplots (D), (E), and (F) use the SLiM simulator, akin to Figure 3 (C) and (D). Data simulations encompass four regimes: D for drift, GC for GC-biased gene conversion, BS for balancing selection, and GC+BS for the combination of gBGC and BS. Inference methods include BalFB, representing inference with PoMoBalance while fixing preferred frequencies  $B$ , and Bal, representing regular inference with PoMoBalance. True values are indicated by dashed and dot-dashed lines in corresponding colours. (A) Posterior plots for the GC-bias rate  $\sigma$ , with green and blue boxplots indicating simulated data in regime D inferred with BalFB and BS inferred with Bal. Magenta and black distributions correspond to regime GC inferred with BalFB and GC+BS inferred with Bal. (B) Estimates for mutation rates, and (C) strengths of BS in the simulation scenario GC+BS. (D) Posterior plots for SLiM data inference in three simulation regimes D (green), BS (blue) and GC (magenta), analogous to (A), indicating the GC-bias rate  $\sigma$ . (E) Estimates for mutation rates and (F) strengths of balancing selection corresponding to the BS simulation scenario in SLiM.

In Figure 4 (A), (B) and (C), we present posterior distributions derived from MCMC inference with the data simulated with the Moran model. The data is simulated under four evolutionary

regimes: D for neutral mutations or drift (depicted in green), GC for GC-biased gene conversion (gBGC, in magenta), BS for balancing selection (in blue), and GC+BS for the combination of gBGC and BS (in black). Refer to Supplementary Table S1 for the true values and inferred parameters. Figure 3 (B) illustrates the SFS for the last case. In the estimation of the posterior in all cases, we discard the MCMC burn-in period.

Within the box plots in Figure 4 (A), we display estimates for the GC-bias rate in all four regimes, which align well with the true values indicated by dashed and dot-dashed lines of the respective colours. Mutation rates are shown in Figure 4 (B), and BS strengths are depicted in Figure 4 (C) focusing solely on the GC+BS regime for brevity. Posterior plots for preferred frequencies are not presented due to spike-like distributions as MCMC chains converge to the true values  $B_{a_i a_j} = 2$  during the burn-in period. This corresponds to the BS peak in the Figure 3 (B) inset.

In Figures 3 (C), (D) and 4 (D), (E), (F), we utilise the evolutionary simulation framework SLiM proposed by [Haller and Messer \(2019\)](#). For this simulation, we employed the great apes tree in Figure S2, implementing heterozygote advantage with SLiM (see Section Supplementary Material 2 for details). The tree inferred with RevBayes in Figure 3 (C) is comparable to the simulated tree, with posterior probabilities at each node equal to 1. The SFS in Figure 3 (C) is extracted from the data and features a well-distinguished peak that is effectively captured by the inference.

In SLiM simulations, we implemented three regimes (D, GC, and BS). The posterior distributions for GC-bias rate in these regimes are illustrated in Figure 4 (D). We obtain reasonable estimates in the D and GC regimes, but in the BS regime,  $\sigma$  is overestimated. This occurrence is due to the challenge of distinguishing  $\sigma$  and  $\pi$  for small virtual populations. While not easily discernible in the mutation rates presented in Figure 4 (E), it becomes apparent when examining the inferred nucleotide base frequencies  $\pi$  (refer to Supplementary Table S2). Increasing the virtual PoMo size to  $N = 20$  resolves this problem partially resulting in much lower  $\sigma_{BS-Bal}=0.008$ . In this analysis, our focus is on the estimation of BS strength, which shows promising results in Figure 4 (E). The preferred frequencies are also inferred accurately, similar to the Moran simulator.

### 3.3 Detection of Balancing Selection in *Drosophila erecta*

In this analysis, we examine sequences derived from experimental genomic data of various *Drosophila* subspecies. We specifically explore the example of sexual dimorphism in the  $t_{MSE}$  gene region, featuring the *tan* gene observed in *Drosophila erecta* females, as studied by Yassin *et al.* (2016). Table 2 presents the results of Tajima’s D (Tajima, 1989) and HKA-like (Begun *et al.*, 2007) tests indicating the potential presence of BS in the  $t_{MSE}$  region in contrast to neutral sequences 5-kb upstream and 10-kb downstream from the region.

The conclusion is drawn from a significant elevation of Tajimas D in the region of interest. Regarding the HKA-like test, we observe a notably higher proportion of polymorphic sites (Pol) between dark and light *Drosophila erecta* lines compared to divergent (Div) sites between both *erecta* lines and *Drosophila orena*, a closely related species to *erecta*. This increased polymorphism suggests the presence of BS. However, the chi-square test performed on these short sequences does not yield a significant result. In Yassin *et al.* (2016), the test is conducted on longer sequences containing the  $t_{MSE}$  region and leads to a significant result.

| Gene region      | Tajima’s D | Pol | Div  | Pol/Div |
|------------------|------------|-----|------|---------|
| $t_{MSE}$        | 3.99       | 51  | 28.5 | 1.78    |
| 5-kb upstream    | -1.1       | 40  | 51.9 | 0.77    |
| 10-kb downstream | 0.88       | 32  | 33.5 | 0.95    |

Table 2: Results of Tajima’s D and HKA-like tests, including the number of polymorphic sites (Pol) between dark and light *Drosophila erecta* lines and divergent (Div) sites between both *erecta* lines and *Drosophila orena* in the  $t_{MSE}$  region, along with two neutral regions.

We begin the inference with PoMoSelect to determine the tree and the level of gBGC in *Drosophila* subspecies. We analyse  $t_{MSE}$  region in *Drosophila erecta* dark and light as well as *santomea*, *yakuba*, *melanogaster* and *simulans*. The tree topology obtained with PoMos, as shown in Figure 5, closely resembles the topology obtained by Yassin *et al.* (2016) using the multispecies coalescent method.

The gBGC rate  $\sigma_{Sel}$ , inferred with PoMoSelect alongside the tree in Figure 5, is shown in Figure 6 (A) with green box plot, and it is quite low, as observed in experiments (Robinson *et al.*, 2014). Refer to Supplementary Table S3 for the inferred parameters and Effective Sample Sizes (ESS). The black box plots in Figure 6 show the posterior distributions of the parameters inferred with PoMoBalance for four *Drosophila* subspecies, namely *D. erecta* dark and light, *melanogaster* and *simulans*. Here we discard sequences of *D. santomea* and *yakuba* since they introduce noise



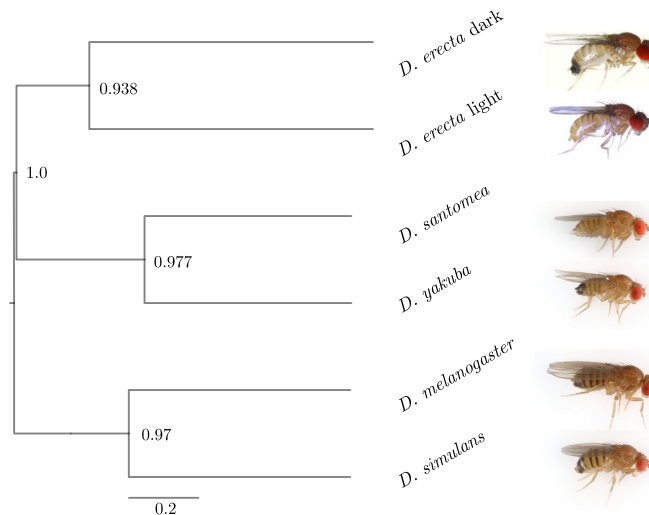

Figure 5: Phylogenetic tree inferred from the sequencing data obtained in the  $t_{MSE}$  region across six subspecies of *Drosophila*. Images of *D. santomea*, *yakuba*, *melanogaster* and *simulans* are credited to Darren Obbard, while those of *D. erecta* are reproduced from [Yassin et al. \(2016\)](#) under Creative Commons licence 4.0.

into BS detection due to low numbers of individuals in the dataset, while still acceptable for PoMoSelect analysis. The results for all subspecies are presented in the Supplementary Material, Figures S3 and S4.

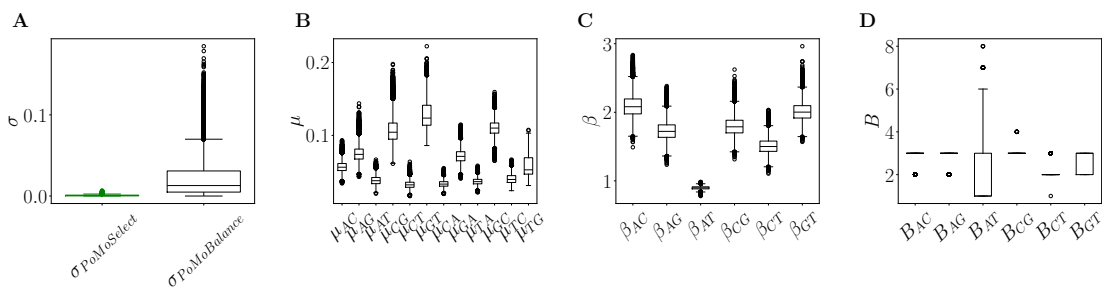

Figure 6: Posterior distributions derived from experimental data extracted from the  $t_{MSE}$  region of six subspecies, as shown in Figure 5 for PoMoSelect inference, and four *Drosophila* subspecies, namely *D. erecta* dark and light, *melanogaster* and *simulans* for PoMoBalance inference. The corresponding SFS for the PoMoBalance is presented in Figure 7. (A) Estimated rates of gBGC with PoMoSelect in green and PoMoBalance in black. (B) Mutation rates, (C) strength of BS and (D) preferred frequencies for BS, all inferred using PoMoBalance.

The posterior distribution for  $\sigma_{PoMoBalance}$  in Figure 6 (A), inferred with PoMoBalance, is much wider than those for  $\sigma_{PoMoSelect}$  as it is challenging to detect GC-bias and BS simultaneously. Thus, we advocate a mixed approach by running PoMoSelect and PoMoBalance in parallel to get more accurate estimates. For example, we learn the tree topology from PoMoSelect and then fix the estimated topology for PoMoBalance analysis. The mutation rates in Figure 6 (B) show great convergence and ESS > 200 for all MCMC chains. The presence of BS is detected

in most of the spectra, indicated by  $\beta > 1$  in Figure 6 (C), while for  $\beta_{AT}$ , we observe purging of selection, indicated by  $\beta < 1$ . The preferred frequencies in Figure 6 (D) coincide or are not far away from the positions of BS peaks in the experimental SFS as shown in Figure 7.

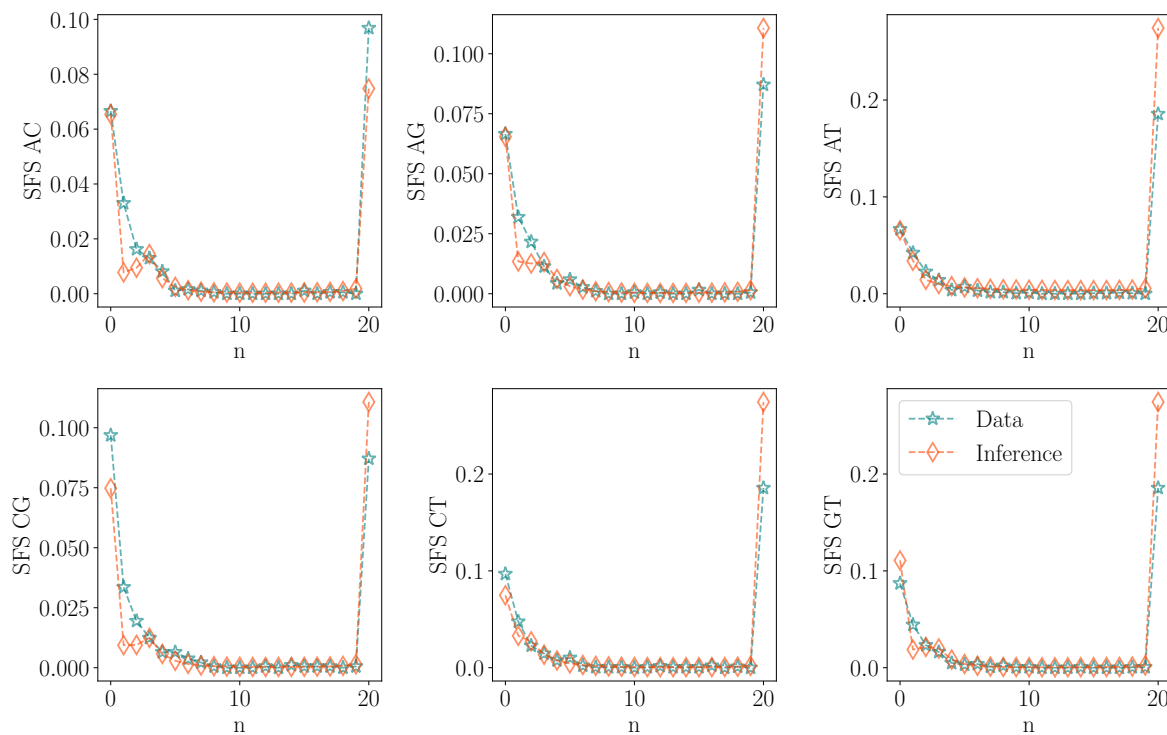

Figure 7: SFS representation for the  $t_{MSE}$  region corresponding to the PoMoBalance analysis in Figure 6 for four subspecies of *Drosophila*, depicted in blue stars, compared with the inferred SFS indicated by red diamonds.

We performed all analyses using the UK Crop Diversity: Bioinformatics HPC Resource and the parallel implementation of RevBayes with 24 parallel processes. The computational time was 85 hours for PoMoSelect (6 subspecies, each containing 6-25 individuals) and 118 hours (4 subspecies, each containing 6-25 individuals) for PoMoBalance to analyse the  $t_{MSE}$  region. For comparison, multispecies coalescent analysis for 2 species with introgression but without BS would take 5 days (Flouri *et al.*, 2020).

## 4 Discussion

Our study validated the implementations of PoMoSelect and PoMoBalance through SBC in Subsection 3.1. Additionally, we conducted a diverse set of tests using data generated from both our custom simulator, based on the Moran model, and the evolutionary simulation framework

SLiM in Subsection 2.1 ([Haller and Messer, 2019](#)). The PoMos demonstrated notable adaptability, particularly in the context of inferring data simulated via SLiM, which incorporates more complex evolutionary dynamics than the Moran model.

While SLiM, grounded in the Wright-Fisher model, shares similarities with the Moran model, it introduces additional complexities such as genetic recombination, population demography (changes in population sizes), and diploid organisms with intricate interactions between drift and heterozygote advantage. Despite these challenges, PoMoBalance performs well in locating balancing selection polymorphic peaks. To align SLiM diploids with PoMos, we treated them as two haplotypes in PoMos.

Notably, while overestimating the GC-bias rate, PoMoBalance excelled in identifying preferred frequencies, specifically in the middle of the SFS, corresponding to heterozygote advantage in SLiM. This represents a unique advantage compared to previous methods ([Hudson \*et al.\*, 1987](#); [Tajima, 1989](#); [Siewert and Voight, 2017](#); [Cheng and DeGiorgio, 2020](#); [Isildak \*et al.\*, 2021](#)), which, while suggestive of the presence of balancing selection, cannot pinpoint specific combinations of alleles, strengths, and preferred frequencies of balancing selection. It is important to acknowledge potential correlations between  $\beta$  and  $\sigma$ , which limits their inference. To address this, we advocate for incorporating extra moves into the MCMC, as discussed in Subsection 2.2.

In Subsection 3.3, we applied PoMoSelect and PoMoBalance to analyse experimental genomic data from *Drosophila erecta*, specifically focusing on the  $t_{MSE}$  region known to exhibit balancing selection ([Yassin \*et al.\*, 2016](#)). Our application of PoMos reproduced previous insights by [Yassin \*et al.\* \(2016\)](#) into the phylogenetic relationships among *Drosophila* subspecies.

Note, that the outcomes of the inference for CG-bias rate and mutation rates are presented in terms of the virtual PoMos population sizes, which typically differ from the actual population sizes. To accurately reflect the actual population dynamics in *Drosophila*, it is necessary to map the values of  $\mu$ ,  $\sigma$ ,  $\beta$  and  $B$  from virtual PoMos size to effective population size. This mapping results in substantially reduced parameter values for  $\sigma$  and  $\mu$ , as found by [Borges \*et al.\* \(2019\)](#), given the large effective population sizes characteristic of *Drosophila* ([Kelley \*et al.\*, 2005](#)). The mapping for the preferred frequency is relatively straightforward, and we plan to propose a mapping for the BS strengths in future research.

Through PoMoBalance analysis, we detect BS in the majority of allele combinations, in contrast

to the absence of BS peaks in neutral regions. Additionally, we observe the purging of selection for AT alleles, signifying the removal of polymorphisms at a rate higher than expected under neutral conditions. While this discovery showcases the flexibility of our method, interpreting its biological implications is challenging. Moreover, such interpretation might be unnecessary, as the mean value for  $\beta_{AT}$  is only slightly smaller than 1, indicating neutrality expectations and suggesting a relatively weak effect.

## 5 Conclusion

We incorporated the PoMoBalance model, a generalised form of PoMos capable of detecting BS, into RevBayes, a widely used phylogenetic software based on Bayesian inference. This integration enriches the resources available to researchers engaged in phylogenetic analysis, providing a robust framework for precise species tree inference and concurrent parameter estimation. Notably, our implementation allows for the estimation of balancing selection, including preferred frequencies and specific alleles under selection, while also disentangling it from other forms of selection. PoMoBalance exhibits versatility in capturing various selection types, including purging selection, observed when the level of observed polymorphisms is lower than expected via genetic drift and directional selection. These effects may arise from a combination of dominance effects, such as underdominance, or purifying selection in the context of background selection, etc.

In general, we provide a comprehensive framework to use PoMos for the estimation of phylogenetic trees, GC-bias and BS. The approach involves several key steps. First, we employ the PoMoSelect to estimate tree topology, GC-bias rate, and mutations. Subsequently, we use PoMoBalance to estimate all parameters, allowing branch lengths to vary while maintaining a fixed topology learned from PoMoSelect. It is worthwhile to validate the results by comparing the inferred values with PoMoBalance estimates that include a fixed GC-bias rate learned from PoMoSelect. The selection of the best candidates is based on the agreement between the inferred SFS and that estimated from the data. Lastly, in this framework, PoMoBalance is selectively applied to regions that are likely under balancing selection, such as the MHC locus in *Homo sapiens*.

The adaptability and versatility of PoMos address a need in the analysis of complex genomic

datasets since our framework provides accurate phylogenetic inferences across multiple timescales and demonstrate potential for application in genome-wide scans through the parallel inference of multiple genomic regions. In future, we aim to investigate additional genomic factors intertwined with balancing selection, with a specific focus on exploring the role of linkage disequilibrium and its impact on the detection of BS.

## 6 Software Availability

The software RevBayes ([Höhna \*et al.\*, 2016](#); [Höhna \*et al.\*, 2017](#); [Höhna \*et al.\*, 2018](#)) is available at <https://revbayes.github.io/>. PoMoBalance tutorial at <https://revbayes.github.io/tutorials/pomobalance/>.

## 7 Data Availability

The data and the code for PoMoBalance analysis concerning SBC, Moran simulator and SLiM are available via GitHub (<https://github.com/sb2g14/PoMoBalance>). The sequencing data for *Drosophila erecta* and *orena* used in the analysis was previously published by [Yassin \*et al.\* \(2016\)](#), the data for multiple individuals of other related subspecies of *Drosophila* was obtained via BLAST.

## 8 Acknowledgments

We thank Sebastian Höhna, Amir Yassin, Valeria Montano, Dominik Schrempf and Ben Haller for helpful discussions. The authors acknowledge the UK Crop Diversity: Bioinformatics HPC Resource (<https://www.cropdiversity.ac.uk/>) made available for conducting the research reported in this paper. This work was supported by Biotechnology and Biological Sciences Research Council (BBSRC) [BBW00768/1].

## References

- Andrés, A. M., Hubisz, M. J., Indap, A., Torgerson, D. G., Degenhardt, J. D., Boyko, A. R., Gutenkunst, R. N., White, T. J., Green, E. D., Bustamante, C. D., Clark, A. G., and Nielsen, R. 2009. Targets of Balancing Selection in the Human Genome. *Molecular Biology and Evolution*, 26(12): 2755–2764.
- Andrés, A. M., Dennis, M. Y., Kretzschmar, W. W., Cannons, J. L., Lee-Lin, S.-Q., Hurle, B., Program, N. C. S., Schwartzberg, P. L., Williamson, S. H., Bustamante, C. D., Nielsen, R., Clark, A. G., and Green, E. D. 2010. Balancing Selection Maintains a Form of ERAP2 that Undergoes Nonsense-Mediated Decay and Affects Antigen Presentation. *PLOS Genetics*, 6(10): e1001157.
- Bakker, E. G., Toomajian, C., Kreitman, M., and Bergelson, J. 2006. A Genome-Wide Survey of *R* Gene Polymorphisms in *Arabidopsis*. *The Plant Cell*, 18(8): 1803–1818.
- Begun, D. J., Holloway, A. K., Stevens, K., Hillier, L. W., Poh, Y.-P., Hahn, M. W., Nista, P. M., Jones, C. D., Kern, A. D., Dewey, C. N., Pachter, L., Myers, E., and Langley, C. H. 2007. Population Genomics: Whole-Genome Analysis of Polymorphism and Divergence in *Drosophila simulans*. *PLOS Biology*, 5(11): e310.
- Bitarello, B. D., de Filippo, C., Teixeira, J. C., Schmidt, J. M., Kleinert, P., Meyer, D., and Andrés, A. M. 2018. Signatures of Long-Term Balancing Selection in Human Genomes. *Genome Biology and Evolution*, 10(3): 939–955.
- Bitarello, B. D., Brandt, D. Y. C., Meyer, D., and Andrés, A. M. 2023. Inferring Balancing Selection From Genome-Scale Data. *Genome Biology and Evolution*, 15(3): evad032.
- Borges, R. and Kosiol, C. 2020. Consistency and identifiability of the polymorphism-aware phylogenetic models. *Journal of Theoretical Biology*, 486: 110074.
- Borges, R., Szöllösi, G. J., and Kosiol, C. 2019. Quantifying GC-Biased Gene Conversion in Great Ape Genomes Using Polymorphism-Aware Models. *Genetics*, 212(4): 1321–1336.
- Borges, R., Boussau, B., Szöllösi, G. J., and Kosiol, C. 2022a. Nucleotide Usage Biases Distort Inferences of the Species Tree. *Genome Biology and Evolution*, 14(1): evab290.

- Borges, R., Boussau, B., Höhna, S., Pereira, R. J., and Kosiol, C. 2022b. Polymorphism-aware estimation of species trees and evolutionary forces from genomic sequences with RevBayes. *Methods in Ecology and Evolution*, 13(11): 2339–2346.
- Cagan, A., Theunert, C., Laayouni, H., Santpere, G., Pybus, M., Casals, F., Prüfer, K., Navarro, A., Marques-Bonet, T., Bertranpetit, J., and Andrés, A. M. 2016. Natural Selection in the Great Apes. *Molecular Biology and Evolution*, 33(12): 3268–3283.
- Castric, V. and Vekemans, X. 2004. Plant self-incompatibility in natural populations: A critical assessment of recent theoretical and empirical advances. *Molecular Ecology*, 13(10): 2873–2889.
- Charlesworth, D. 2004. Sex determination: Balancing selection in the honey bee. *Current biology: CB*, 14(14): R568–569.
- Charlesworth, D. 2006. Balancing Selection and Its Effects on Sequences in Nearby Genome Regions. *PLoS Genetics*, 2(4): e64.
- Cheng, X. and DeGiorgio, M. 2019. Detection of Shared Balancing Selection in the Absence of Trans-Species Polymorphism. *Molecular Biology and Evolution*, 36(1): 177–199.
- Cheng, X. and DeGiorgio, M. 2020. Flexible Mixture Model Approaches That Accommodate Footprint Size Variability for Robust Detection of Balancing Selection. *Molecular Biology and Evolution*, 37(11): 3267–3291.
- Cheng, X. and DeGiorgio, M. 2022. BalLeRMix+: Mixture model approaches for robust joint identification of both positive selection and long-term balancing selection. *Bioinformatics*, 38(3): 861–863.
- Connallon, T. and Clark, A. G. 2014. Balancing Selection in Species with Separate Sexes: Insights from Fisher’s Geometric Model. *Genetics*, 197(3): 991–1006.
- Croze, M., Wollstein, A., Božičević, V., Živković, D., Stephan, W., and Hutter, S. 2017. A genome-wide scan for genes under balancing selection in *Drosophila melanogaster*. *BMC evolutionary biology*, 17(1): 15.
- De Maio, N., Schlötterer, C., and Kosiol, C. 2013. Linking Great Apes Genome Evolution across Time Scales Using Polymorphism-Aware Phylogenetic Models. *Molecular Biology and Evolution*, 30(10): 2249–2262.

- De Maio, N., Schrempf, D., and Kosiol, C. 2015. PoMo: An Allele Frequency-Based Approach for Species Tree Estimation. *Systematic Biology*, 64(6): 1018–1031.
- Dobzhansky, T. 1955. A review of some fundamental concepts and problems of population genetics. *Cold Spring Harbor Symposia on Quantitative Biology*, 20: 1–15.
- Fijarczyk, A. and Babik, W. 2015. Detecting balancing selection in genomes: Limits and prospects. *Molecular Ecology*, 24(14): 3529–3545.
- Flouri, T., Jiao, X., Rannala, B., and Yang, Z. 2020. A Bayesian Implementation of the Multispecies Coalescent Model with Introgression for Phylogenomic Analysis. *Molecular Biology and Evolution*, 37(4): 1211–1223.
- Haller, B. C. and Messer, P. W. 2019. SLiM 3: Forward Genetic Simulations Beyond the Wright–Fisher Model. *Molecular Biology and Evolution*, 36(3): 632–637.
- Höhna, S., Landis, M. J., Heath, T. A., Boussau, B., Lartillot, N., Moore, B. R., Huelsenbeck, J. P., and Ronquist, F. 2016. RevBayes: Bayesian Phylogenetic Inference Using Graphical Models and an Interactive Model-Specification Language. *Systematic Biology*, 65(4): 726–736.
- Hohna, S., Landis, M. J., and Heath, T. A. 2017. Phylogenetic Inference Using RevBayes. *Current Protocols in Bioinformatics*, pages 6.16.1–6.16.34.
- Höhna, S., Coghill, L. M., Mount, G. G., Thomson, R. C., and Brown, J. M. 2018. P3: Phylogenetic Posterior Prediction in RevBayes. *Molecular Biology and Evolution*, 35(4): 1028–1034.
- Hudson, R. R., Kreitman, M., and Aguadé, M. 1987. A test of neutral molecular evolution based on nucleotide data. *Genetics*, 116(1): 153–159.
- Isildak, U., Stella, A., and Fumagalli, M. 2021. Distinguishing between recent balancing selection and incomplete sweep using deep neural networks. *Molecular Ecology Resources*, 21(8): 2706–2718.
- Kelley, J., Walter, L., and Trowsdale, J. 2005. Comparative genomics of major histocompatibility complexes. *Immunogenetics*, 56(10): 683–695.
- Kim, K.-W., Jackson, B. C., Zhang, H., Toews, D. P. L., Taylor, S. A., Greig, E. I., Lovette, I. J., Liu, M. M., Davison, A., Griffith, S. C., Zeng, K., and Burke, T. 2019. Genetics and



- evidence for balancing selection of a sex-linked colour polymorphism in a songbird. *Nature Communications*, 10(1): 1852.
- Korfmann, K., Gaggiotti, O. E., and Fumagalli, M. 2023. Deep Learning in Population Genetics. *Genome Biology and Evolution*, 15(2): evad008.
- Lanchier, N. 2017. Wright–Fisher and Moran models. In N. Lanchier, editor, *Stochastic Modeling*, Universitext, pages 203–218. Springer International Publishing, Cham.
- Laval, G., Peyrégne, S., Zidane, N., Harmant, C., Renaud, F., Patin, E., Prugnolle, F., and Quintana-Murci, L. 2019. Recent Adaptive Acquisition by African Rainforest Hunter-Gatherers of the Late Pleistocene Sickle-Cell Mutation Suggests Past Differences in Malaria Exposure. *American Journal of Human Genetics*, 104(3): 553–561.
- Lawrence, M. J. 2000. Population Genetics of the Homomorphic Self-incompatibility Polymorphisms in Flowering Plants. *Annals of Botany*, 85(suppl\_1): 221–226.
- Mank, J. E. 2017. Population genetics of sexual conflict in the genomic era. *Nature Reviews Genetics*, 18(12): 721–730.
- Moran, P. a. P. 1958. Random processes in genetics. *Mathematical Proceedings of the Cambridge Philosophical Society*, 54(1): 60–71.
- Robinson, M. C., Stone, E. A., and Singh, N. D. 2014. Population Genomic Analysis Reveals No Evidence for GC-Biased Gene Conversion in *Drosophila melanogaster*. *Molecular Biology and Evolution*, 31(2): 425–433.
- Rozewicki, J., Li, S., Amada, K. M., Standley, D. M., and Katoh, K. 2019. MAFFT-DASH: Integrated protein sequence and structural alignment. *Nucleic Acids Research*, 47(W1): W5–W10.
- Schrempf, D., Minh, B. Q., De Maio, N., von Haeseler, A., and Kosiol, C. 2016. Reversible polymorphism-aware phylogenetic models and their application to tree inference. *Journal of Theoretical Biology*, 407: 362–370.
- Schrempf, D., Minh, B. Q., von Haeseler, A., and Kosiol, C. 2019. Polymorphism-Aware Species Trees with Advanced Mutation Models, Bootstrap, and Rate Heterogeneity. *Molecular Biology and Evolution*, 36(6): 1294–1301.

- Sheehan, S. and Song, Y. S. 2016. Deep Learning for Population Genetic Inference. *PLOS Computational Biology*, 12(3): e1004845.
- Siewert, K. M. and Voight, B. F. 2017. Detecting Long-Term Balancing Selection Using Allele Frequency Correlation. *Molecular Biology and Evolution*, 34(11): 2996–3005.
- Spurgin, L. G. and Richardson, D. S. 2010. How pathogens drive genetic diversity: MHC, mechanisms and misunderstandings. *Proceedings of the Royal Society B: Biological Sciences*, 277(1684): 979–988.
- Tajima, F. 1989. Statistical method for testing the neutral mutation hypothesis by DNA polymorphism. *Genetics*, 123(3): 585–595.
- Talts, S., Betancourt, M., Simpson, D., Vehtari, A., and Gelman, A. 2020. Validating Bayesian Inference Algorithms with Simulation-Based Calibration.
- Tavare, S. 1986. Some probabilistic and statistical problems in the analysis of DNA sequences. *Lectures on Mathematics in the Life Sciences*, 17: 57–86.
- Yassin, A., Bastide, H., Chung, H., Veuille, M., David, J. R., and Pool, J. E. 2016. Ancient balancing selection at tan underlies female colour dimorphism in *Drosophila erecta*. *Nature Communications*, 7(1): 10400.
- Zeng, K., Charlesworth, B., and Hobolth, A. 2021. Studying models of balancing selection using phase-type theory. *Genetics*, 218(2): iyab055.

## Supplementary Material 1 Stationary Distribution and Reversibility in PoMoBalance

The stationary distribution  $\psi$  provides the opportunity to investigate the long-term behavior of the interplay between mutational bias, genetic drift, directional, and balancing selection on population diversity. In the biallelic case, the Moran dynamic exemplifies a birth-and-death process, known for its reversibility. Consequently, we obtained the stationary distribution by initially formulating the detailed balance equations. To simplify the notation, we redefine the state  $\{na_i, (N-n)a_j\}$  to only represent the frequency of the  $a_i$  allele: i.e.,  $\{n\}$ .

$$\psi_{\{n\}} q^{\{na_i, (N-n)a_j\} \rightarrow \{(n+1)a_i, (N-n-1)a_j\}} = \psi_{\{n+1\}} q^{\{(n+1)a_i, (N-n-1)a_j\} \rightarrow \{na_i, (N-n)a_j\}} \quad . \quad (\text{S1})$$

The detailed balance equations allow us to derive the following recursive formula, which is employed to obtain the stationary quantities for both fixed and polymorphic states

$$\psi_{\{n\}} = \psi_{\{0\}} \prod_{k=1}^n \frac{q^{\{k-1\} \rightarrow \{k\}}}{q^{\{k\} \rightarrow \{k-1\}}} \quad . \quad (\text{S2})$$

If we set  $n = N$ , the recursive formula becomes

$$\psi_{\{N\}} = \psi_{\{0\}} \prod_{k=1}^N \frac{q^{\{k-1\} \rightarrow \{k\}}}{q^{\{k\} \rightarrow \{k-1\}}} = \psi_{\{0\}} \frac{q^{\{0\} \rightarrow \{1\}}}{q^{\{1\} \rightarrow \{0\}}} \cdots \frac{q^{\{n-1\} \rightarrow \{n\}}}{q^{\{n\} \rightarrow \{n-1\}}} \cdots \frac{q^{\{N-1\} \rightarrow \{N\}}}{q^{\{N\} \rightarrow \{N-1\}}} \quad , \quad (\text{S3})$$

from which by considering the rates of the process defined in the rate matrix  $Q$  in Equation (2), we find the normalized stationary quantities for the fixed states

$$\frac{\psi_{\{N\}}}{\psi_{\{0\}}} = \frac{\mu_{a_j a_i} (1 + \sigma_{a_i})^{N-1}}{\mu_{a_i a_j} (1 + \sigma_{a_j})^{N-1}} \beta^{2B_{a_i a_j} - N} \quad . \quad (\text{S4})$$

An interesting aspect is that the differentiated impact of BS in the fixed states disappears when the balanced frequency sits in the middle of the frequency spectrum (i.e.,  $B_{a_i a_j} = N/2$ ). By applying the Kolmogorov criterion to each closed chain in the PoMoBalance model described with Equation (2) we ensure that reversibility is satisfied when  $B_{a_i a_j} = N/2$  and breaks in all other cases.

The stationary distributions  $\psi_{\{n\}}$  may be multiplied by any arbitrary constant without affecting

the final result thanks to the normalisation condition. Thus, we are safe to assume that we could set

$$\psi_{\{0\}} = k^{-1} \mu_{a_i a_j} (1 + \sigma_{a_j})^{N-1} \quad , \quad (\text{S5})$$

where  $k$  is obtained from the normalisation condition  $\sum_{i=0}^N \psi_{\{i\}} = 1$ . Then from equation (S4) we find

$$\psi_{\{N\}} = k^{-1} \mu_{a_j a_i} (1 + \sigma_{a_i})^{N-1} \beta^{2B_{a_i a_j} - N} \quad . \quad (\text{S6})$$

Similarly to the fixed states, the stationary measures for the polymorphic states can be derived using the recursive formula in equation (S2)

$$\begin{aligned} \psi_{\{n\}} &= \psi_{\{0\}} \frac{q^{\{0\} \rightarrow \{1\}}}{q^{\{1\} \rightarrow \{0\}}} \cdots \frac{q^{\{k\} \rightarrow \{k+1\}}}{q^{\{k\} \rightarrow \{k-1\}}} \cdots \frac{q^{\{n-1\} \rightarrow \{n\}}}{q^{\{n\} \rightarrow \{n-1\}}} \\ &= k^{-1} \mu_{a_j a_i} \mu_{a_i a_j} \frac{N}{n(N-n)} (1 + \sigma_{a_j})^{N-n-1} (1 + \sigma_{a_i})^{n-1} \beta^{B_{a_i a_j} - |n - B_{a_i a_j}| - 1} \quad . \end{aligned} \quad (\text{S7})$$

This solution clearly illustrates the contribution of mutational bias, genetic drift, directional selection, and BS to the frequency of polymorphic states. As expected, the BS term is highest when  $n = B_{a_i a_j}$  and decays in the direction of the boundary states. This feature becomes evident when we compare the stationary distribution with and without the effect of BS in Figure S1.

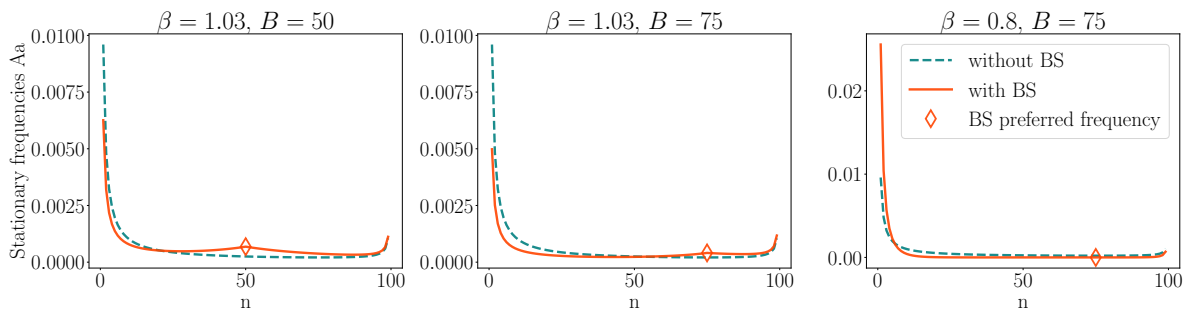

Figure S1: The plots depict the stationary distribution of a population of  $N = 100$  individuals, and a biallelic locus with alleles  $A$  and  $a$  that evolves under mutational bias ( $\mu_{Aa} = 0.02 > \mu_{aA} = 0.01$ ), directional selection ( $\sigma_A = 0.01 > \sigma_a = 0.0$ ) and three regimes of BS. Here we present frequencies in the range  $[1, N - 1]$  to avoid very high tails that dominate the BS peak.

Because we are interested in modelling BS, we have been assuming that  $\beta_{a_i a_j}$  acts to maintain diversity at a certain frequency  $B_{a_i a_j}$ . Mathematically speaking, we have been assuming that  $\beta_{a_i a_j} > 1$ . However, an interesting behaviour emerges when  $\beta_{a_i a_j} < 1$ . In this case, the BS term acts to purge variation more than what is already expected by genetic drift and directional selection, as shown in Figure S1. We refer to this regime as purging selection.

We normalize the obtained stationary quantities obtained in equations (S5), (S6) and (S7) to sum up to 1. The stationary distribution normalization constant is

$$k = \mu_{a_i a_j} (1 + \sigma_{a_j})^{N-1} + \mu_{a_j a_i} \mu_{a_i a_j} \sum_{n=1}^{N-1} \frac{N}{n(N-n)} (1 + \sigma_{a_j})^{N-n-1} (1 + \sigma_{a_i})^{n-1} \beta_{a_i a_j}^{B_{a_i a_j} - |n - B_{a_i a_j}| - 1} + \mu_{a_j a_i} (1 + \sigma_{a_i})^{N-1} \beta^{2B_{a_i a_j} - N} \quad . \quad (\text{S8})$$

## Supplementary Material 2 Simulations with SLiM

The original scripts for SLiM simulations can be found in the supplementary repository (<https://github.com/sb2g14/PoMoBalance>). We ran nucleotide models, simulating  $10^5$  genomic sites with drift only using ‘initializeMutationTypeNuc("m1", 0.5, "f", 0.0)’, drift+gc-bias using ‘initializeGeneConversion(0.3, 1500, 0.80, 1.0)’, drift+heterozygote advantage with ‘initializeMutationTypeNuc("m2", 1.1, "f", 0.1)’, where the coefficient 1.1 simulates overdominance. We set the mutation rate to  $10^{-6}$  and the recombination rate to  $10^{-5}$ . These rates are higher than physiological ones for computational purposes, but they work well for the purposes of our analysis.

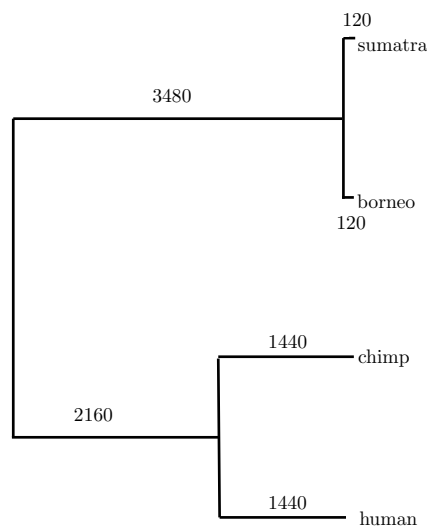

Figure S2: Phylogenetic tree simulated with SLiM, the inferred tree is presented in Figure 3 (C), here the branch lengths are expressed in the simulated generations.

We initialised a population of 2000 individuals of *Homininae* and evolved them for 10000 populations as a burn-in step. Then we split them into 1000 of *Hominini* and 1000 of *Gorillini*.

Following the numbers of generations shown in Figure 1 we end up with *Orangutan sumatra*, *Orangutan borneo*, *chimp* and *human*, each containing 500 individuals.

Finally, the ancestral sequences (`.FASTA`) and polymorphic data (`.VCF`) are written out as output for each population.

Note that in the inference with the data simulated with SLiM, as shown in Table S2, the BS strengths  $\beta$  for the neutral case and GC-biased case are significantly underestimated (the most are 0.7 instead of 1). This is presumably due to noise in the simulations, especially when SLiM diploids are mapped to small population sizes in PoMos. Interestingly, with an increase in the population size, such misspecification is reduced, and for  $N = 20$ , we obtain  $\beta = 0.9$ .

## Supplementary Material 3 Supplementary Figures

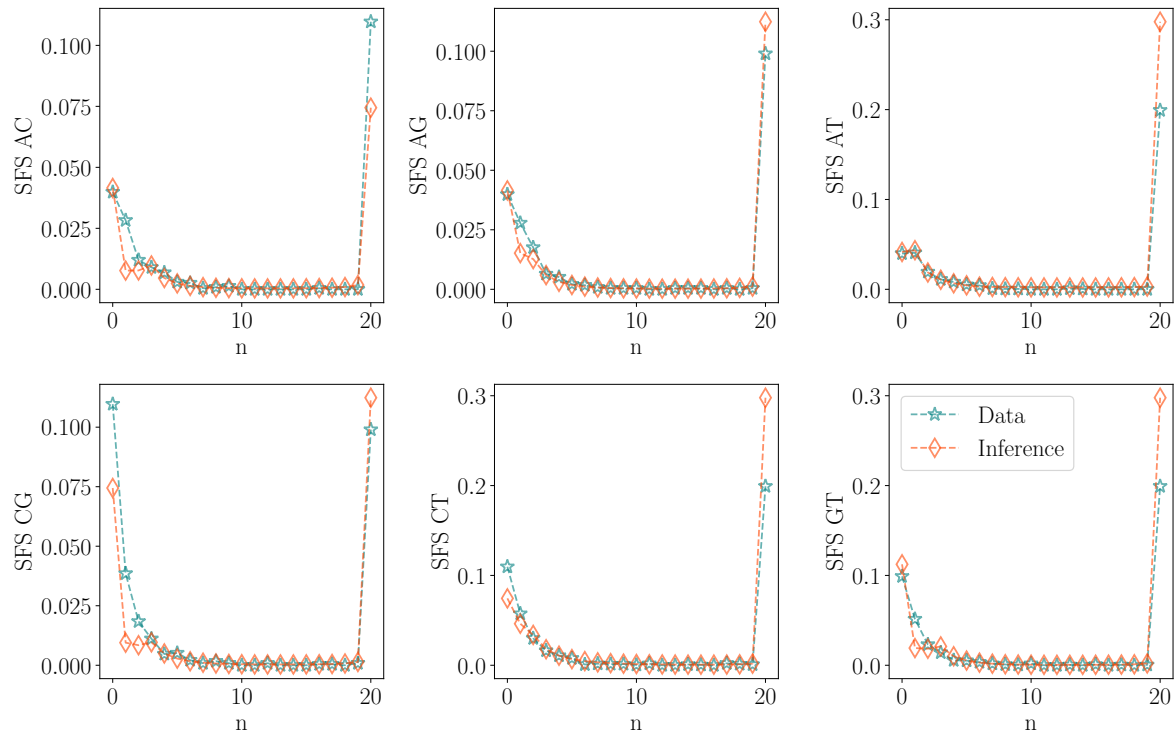

Figure S3: SFS representation for the  $t_{MSE}$  region in six subspecies of *Drosophila*, denoted by blue stars, is compared with the SFS inferred using PoMoBalance, represented by red diamonds.

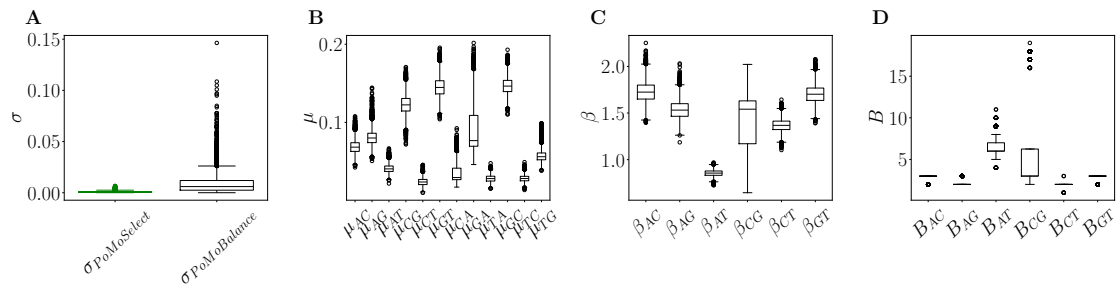

Figure S4: Posterior distributions derived from experimental data extracted from the  $t_{MSE}$  region of six *Drosophila* subspecies. The corresponding tree and SFS are presented in Figure 5 and S3. (A) Estimated rates of gBGC with PoMoSelect in green and PoMoBalance in black. (B) Mutation rates, (C) strength of BS and (D) preferred frequencies for BS, all inferred using PoMoBalance.

## Supplementary Material 4 Supplementary Tables

| Variable | Drift       |                |                        | GC-bias      |                |                        |
|----------|-------------|----------------|------------------------|--------------|----------------|------------------------|
|          | True values | Posterior mean | 95 % credible interval | True values  | Posterior mean | 95 % credible interval |
| sigma    | 0           | 0.042          | [0, 0.205]             | 0.1          | 0.098          | [0.0013, 0.197]        |
| pi_A     | 0.25        | 0.257          | [0.253, 0.261]         | 0.25         | 0.249          | [0.244, 0.255]         |
| pi_C     | 0.25        | 0.252          | [0.247, 0.256]         | 0.25         | 0.254          | [0.248, 0.259]         |
| pi_G     | 0.25        | 0.242          | [0.238, 0.247]         | 0.25         | 0.249          | [0.244, 0.254]         |
| pi_T     | 0.25        | 0.249          | [0.244, 0.254]         | 0.25         | 0.248          | [0.243, 0.253]         |
| rho_AC   | 0.1         | 0.098          | [0.095, 0.1]           | 0.1          | 0.099          | [0.096, 0.101]         |
| rho_AG   | 0.1         | 0.1            | [0.098, 0.103]         | 0.1          | 0.1            | [0.097, 0.103]         |
| rho_AT   | 0.1         | 0.098          | [0.096, 0.101]         | 0.1          | 0.1            | [0.097, 0.103]         |
| rho_CG   | 0.1         | 0.102          | [0.099, 0.105]         | 0.1          | 0.1            | [0.097, 0.103]         |
| rho_CT   | 0.1         | 0.099          | [0.097, 0.102]         | 0.1          | 0.098          | [0.095, 0.1]           |
| rho_GT   | 0.1         | 0.101          | [0.098, 0.103]         | 0.1          | 0.102          | [0.1, 0.105]           |
| beta_AC  | 1           | 1.039          | [0.968, 1.198]         | 1            | 1.014          | [0.911, 1.098]         |
| beta_AG  | 1           | 1.01           | [0.876, 1.198]         | 1            | 1.018          | [0.926, 1.113]         |
| beta_AT  | 1           | 1.006          | [0.976, 1.035]         | 1            | 0.998          | [0.959, 1.042]         |
| beta_CG  | 1           | 0.978          | [0.945, 1.03]          | 1            | 0.997          | [0.969, 1.025]         |
| beta_CT  | 1           | 1.003          | [0.807, 1.147]         | 1            | 0.999          | [0.892, 1.077]         |
| beta_GT  | 1           | 1.029          | [0.959, 1.232]         | 1            | 0.991          | [0.894, 1.072]         |
|          | BS          |                |                        | GC-bias + BS |                |                        |
| sigma    | 0           | 0.0014         | [0, 0.004]             | 0.1          | 0.0014         | [0, 0.004]             |
| pi_A     | 0.25        | 0.248          | [0.242, 0.253]         | 0.25         | 0.254          | [0.247, 0.26]          |
| pi_C     | 0.25        | 0.254          | [0.249, 0.258]         | 0.25         | 0.252          | [0.247, 0.258]         |
| pi_G     | 0.25        | 0.245          | [0.242, 0.249]         | 0.25         | 0.247          | [0.243, 0.252]         |
| pi_T     | 0.25        | 0.253          | [0.25, 0.257]          | 0.25         | 0.248          | [0.243, 0.252]         |
| rho_AC   | 0.1         | 0.102          | [0.099, 0.106]         | 0.1          | 0.098          | [0.094, 0.101]         |
| rho_AG   | 0.1         | 0.101          | [0.099, 0.105]         | 0.1          | 0.102          | [0.099, 0.105]         |
| rho_AT   | 0.1         | 0.101          | [0.098, 0.104]         | 0.1          | 0.099          | [0.095, 0.102]         |
| rho_CG   | 0.1         | 0.1            | [0.097, 0.102]         | 0.1          | 0.1            | [0.097, 0.103]         |
| rho_CT   | 0.1         | 0.098          | [0.095, 0.1]           | 0.1          | 0.099          | [0.096, 0.101]         |
| rho_GT   | 0.1         | 0.101          | [0.099, 0.103]         | 0.1          | 0.098          | [0.096, 0.1]           |
| B_AC     | 2           | 2              | [2.0, 2.0]             | 2            | 2              | [2.0, 2.0]             |
| B_AG     | 2           | 2              | [2.0, 2.0]             | 2            | 2              | [2.0, 2.0]             |
| B_AT     | 2           | 2              | [2.0, 2.0]             | 2            | 2              | [2.0, 2.0]             |
| B_CG     | 2           | 2              | [2.0, 2.0]             | 2            | 2              | [2.0, 2.0]             |
| B_CT     | 2           | 2              | [2.0, 2.0]             | 2            | 2              | [2.0, 2.0]             |
| B_GT     | 2           | 2              | [2.0, 2.0]             | 2            | 2              | [2.0, 2.0]             |
| beta_AC  | 2           | 1.991          | [1.934, 2.047]         | 2            | 1.991          | [1.934, 2.047]         |
| beta_AG  | 2           | 1.982          | [1.931, 2.029]         | 2            | 1.982          | [1.931, 2.029]         |
| beta_AT  | 2           | 1.994          | [1.958, 2.029]         | 2            | 1.994          | [1.958, 2.029]         |
| beta_CG  | 2           | 2.067          | [2.022, 2.117]         | 2            | 2.067          | [2.022, 2.117]         |
| beta_CT  | 2           | 2.013          | [1.98, 2.043]          | 2            | 2.013          | [1.98, 2.043]          |
| beta_GT  | 2           | 1.969          | [1.939, 1.996]         | 2            | 1.969          | [1.939, 1.996]         |

Table S1: Results of converged MCMC chain for Figure 3 (A), (B) and 4 (A), (B), (C).



| Variable  | Drift       |                |                        | GC-bias     |                |                        |
|-----------|-------------|----------------|------------------------|-------------|----------------|------------------------|
|           | True values | Posterior mean | 95 % credible interval | True values | Posterior mean | 95 % credible interval |
| sigma     | 0           | 0.0026         | [0, 0.0058]            | 0.04        | 0.032          | [0.023, 0.042]         |
| pi_A      | 0.25        | 0.252          | [0.248, 0.257]         | 0.25        | 0.166          | [0.16, 0.172]          |
| pi_C      | 0.25        | 0.249          | [0.245, 0.253]         | 0.25        | 0.23           | [0.224, 0.238]         |
| pi_G      | 0.25        | 0.248          | [0.244, 0.252]         | 0.25        | 0.302          | [0.294, 0.311]         |
| pi_T      | 0.25        | 0.251          | [0.246, 0.255]         | 0.25        | 0.301          | [0.291, 0.311]         |
| rho_AC    | 0.04        | 0.041          | [0.04, 0.043]          | 0.03        | 0.047          | [0.044, 0.049]         |
| rho_AG    | 0.04        | 0.042          | [0.041, 0.044]         | 0.03        | 0.037          | [0.035, 0.038]         |
| rho_AT    | 0.04        | 0.041          | [0.039, 0.043]         | 0.03        | 0.031          | [0.029, 0.032]         |
| rho_CG    | 0.04        | 0.042          | [0.04, 0.044]          | 0.03        | 0.031          | [0.03, 0.033]          |
| rho_CT    | 0.04        | 0.039          | [0.038, 0.041]         | 0.03        | 0.029          | [0.028, 0.031]         |
| rho_GT    | 0.04        | 0.039          | [0.037, 0.04]          | 0.03        | 0.03           | [0.028, 0.031]         |
| beta_AC   | 1           | 0.71           | [0.692, 0.727]         | 1           | 0.749          | [0.73, 0.769]          |
| beta_AG   | 1           | 0.719          | [0.7, 0.736]           | 1           | 0.822          | [0.799, 0.845]         |
| beta_AT   | 1           | 0.714          | [0.696, 0.732]         | 1           | 1.094          | [1.069, 1.12]          |
| beta_CG   | 1           | 0.7            | [0.682, 0.717]         | 1           | 0.794          | [0.775, 0.814]         |
| beta_CT   | 1           | 0.711          | [0.693, 0.73]          | 1           | 0.849          | [0.815, 0.883]         |
| beta_GT   | 1           | 0.733          | [0.714, 0.751]         | 1           | 0.694          | [0.668, 0.718]         |
| <b>BS</b> |             |                |                        |             |                |                        |
| sigma     | 0           | 0.017          | [0.01, 0.025]          |             |                |                        |
| pi_A      | 0.25        | 0.268          | [0.259, 0.276]         |             |                |                        |
| pi_C      | 0.25        | 0.233          | [0.224, 0.241]         |             |                |                        |
| pi_G      | 0.25        | 0.231          | [0.222, 0.238]         |             |                |                        |
| pi_T      | 0.25        | 0.269          | [0.261, 0.277]         |             |                |                        |
| rho_AC    | 0.00032     | 0.00031        | [0.00029, 0.00034]     |             |                |                        |
| rho_AG    | 0.00032     | 0.00032        | [0.0003, 0.00034]      |             |                |                        |
| rho_AT    | 0.00032     | 0.0003         | [0.00027, 0.00032]     |             |                |                        |
| rho_CG    | 0.00032     | 0.00033        | [0.0003, 0.00036]      |             |                |                        |
| rho_CT    | 0.00032     | 0.00029        | [0.00027, 0.00031]     |             |                |                        |
| rho_GT    | 0.00032     | 0.00029        | [0.00027, 0.00032]     |             |                |                        |
| B_AC      | 5.0         | 5.0            | [5.0, 5.0]             |             |                |                        |
| B_AG      | 5.0         | 5.0            | [5.0, 5.0]             |             |                |                        |
| B_AT      | 5.0         | 5.0            | [5.0, 5.0]             |             |                |                        |
| B_CG      | 5.0         | 5.0            | [5.0, 5.0]             |             |                |                        |
| B_CT      | 5.0         | 5.0            | [5.0, 5.0]             |             |                |                        |
| B_GT      | 5.0         | 5.0            | [5.0, 5.0]             |             |                |                        |
| beta_AC   | 7.0         | 6.956          | [6.814, 7.085]         |             |                |                        |
| beta_AG   | 7.0         | 6.958          | [6.827, 7.095]         |             |                |                        |
| beta_AT   | 7.0         | 6.981          | [6.839, 7.107]         |             |                |                        |
| beta_CG   | 7.0         | 7.093          | [6.956, 7.228]         |             |                |                        |
| beta_CT   | 7.0         | 7.158          | [7.027, 7.304]         |             |                |                        |
| beta_GT   | 7.0         | 7.074          | [6.934, 7.217]         |             |                |                        |

Table S2: Results of converged MCMC chain for Figure 3 (C), (D) and 4 (D), (E), (F).

| Variable | PoMoSelect     |                        |      | PoMoBalance    |                        |       |
|----------|----------------|------------------------|------|----------------|------------------------|-------|
|          | Posterior mean | 95 % credible interval | ESS  | Posterior mean | 95 % credible interval | ESS   |
| sigma    | 0.00081        | [0, 0.0023]            | 7660 | 0.022          | [0, 0.074]             | 472   |
| pi_A     | 0.176          | [0.139, 0.216]         | 1773 | 0.422          | [0.358, 0.488]         | 341   |
| pi_C     | 0.292          | [0.254, 0.33]          | 3696 | 0.32           | [0.278, 0.365]         | 1645  |
| pi_G     | 0.225          | [0.191, 0.258]         | 3760 | 0.151          | [0.115, 0.193]         | 241   |
| pi_T     | 0.306          | [0.272, 0.343]         | 4787 | 0.107          | [0.082, 0.134]         | 641   |
| rho_AC   | 0.028          | [0.021, 0.036]         | 2950 | 0.178          | [0.135, 0.226]         | 759   |
| rho_AG   | 0.032          | [0.024, 0.041]         | 3008 | 0.255          | [0.193, 0.331]         | 2654  |
| rho_AT   | 0.025          | [0.019, 0.031]         | 2267 | 0.304          | [0.238, 0.379]         | 1920  |
| rho_CG   | 0.022          | [0.018, 0.026]         | 4943 | 0.224          | [0.173, 0.28]          | 1286  |
| rho_CT   | 0.02           | [0.017, 0.023]         | 4726 | 0.344          | [0.284, 0.409]         | 2377  |
| rho_GT   | 0.018          | [0.015, 0.021]         | 4042 | 0.379          | [0.286, 0.485]         | 406   |
| B_AC     | -              | -                      | -    | 2.995          | [3.0, 3.0]             | 2375  |
| B_AG     | -              | -                      | -    | 2.86           | [2.0, 3.0]             | 1315  |
| B_AT     | -              | -                      | -    | 1.954          | [1.0, 4.0]             | 386   |
| B_CG     | -              | -                      | -    | 3              | [3.0, 3.0]             | 29347 |
| B_CT     | -              | -                      | -    | 2.016          | [2.0, 2.0]             | 6304  |
| B_GT     | -              | -                      | -    | 2.638          | [2.0, 3.0]             | 165   |
| beta_AC  | -              | -                      | -    | 2.091          | [1.782, 2.417]         | 3515  |
| beta_AG  | -              | -                      | -    | 1.73           | [1.47, 2.009]          | 1166  |
| beta_AT  | -              | -                      | -    | 0.898          | [0.854, 0.941]         | 1646  |
| beta_CG  | -              | -                      | -    | 1.796          | [1.526, 2.067]         | 4819  |
| beta_CT  | -              | -                      | -    | 1.508          | [1.291, 1.73]          | 559   |
| beta_GT  | -              | -                      | -    | 2.011          | [1.752, 2.283]         | 9919  |

Table S3: Results of the inference combined from 4 MCMC chains for Figure 6 and 7.
